# Supplementary material for: Observations of strong turbulence and mixing impacting water exchange between two basins in the Baltic Sea
Source: Copernicus journal article supplement (doi:10.5194/os-19-1809-2023), 2023-12-20
Supplement: Supplementary file 1 [file os-19-1809-2023-supplement.pdf]

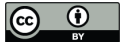

*Supplement of*

## **Observations of strong turbulence and mixing impacting water exchange between two basins in the Baltic Sea**

**Julia Muchowski et al.**

*Correspondence to:* Julia Muchowski ([julia.muchowski@geo.su.se](mailto:julia.muchowski@geo.su.se))

The copyright of individual parts of the supplement might differ from the article licence.

# Supplementary

- SV1: Video EL19 acoustic data collection continuously between 25 Feb. 2019, 18:30 UTC and 26 Feb. 2019, 16:00 UTC (transects T18-T37, Table ST1), collocated MSS data exist and are shown for T37 in Figures 2,4 as well as included in Figures 9,10.
- SV2: Video 1, EL20 acoustic data collection continuously between 4 March 2020, 21:30 UTC and 5 March 2020, 14:30 UTC (transects T28-T39, Table ST2), collocated MSS data exist and are included in Figures 9,10.
- SV3: Video 2, EL20 acoustic data collection continuously between 5 March 2020, 17:20 UTC and 6 March 2020, 04:30 UTC, transects only sampled with EK80 and ADCP, no collocated MSS data due to problems with MSS profiler.

SMHI wind data from station Örskär (60.5256 °N, 18.3729 °E) in the vicinity of the study region

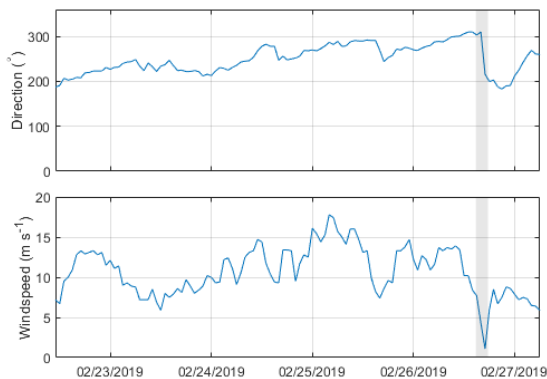

15 **Figure S1: Measured wind direction and wind speed at SMHI station Örskär during the time of cruise EL19-IGV01. Grey shaded area marks time when transect T37 was measured, which is shown in Fig. 2 of the main manuscript.**

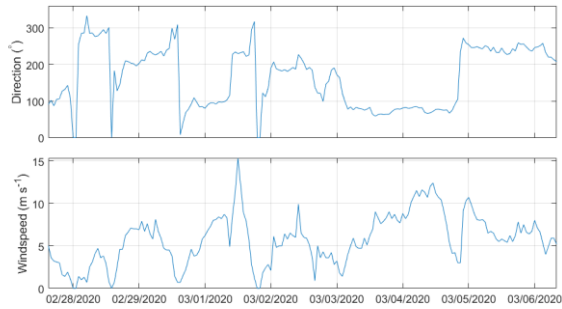

**Figure S2: Measured wind direction and wind speed at SMHI station Örskär during the time of cruise EL20-IGV01.**

20 ADCP mooring data collected during the times of all three movies are shown in Figures 7,8 for EL19 and EL20, respectively.

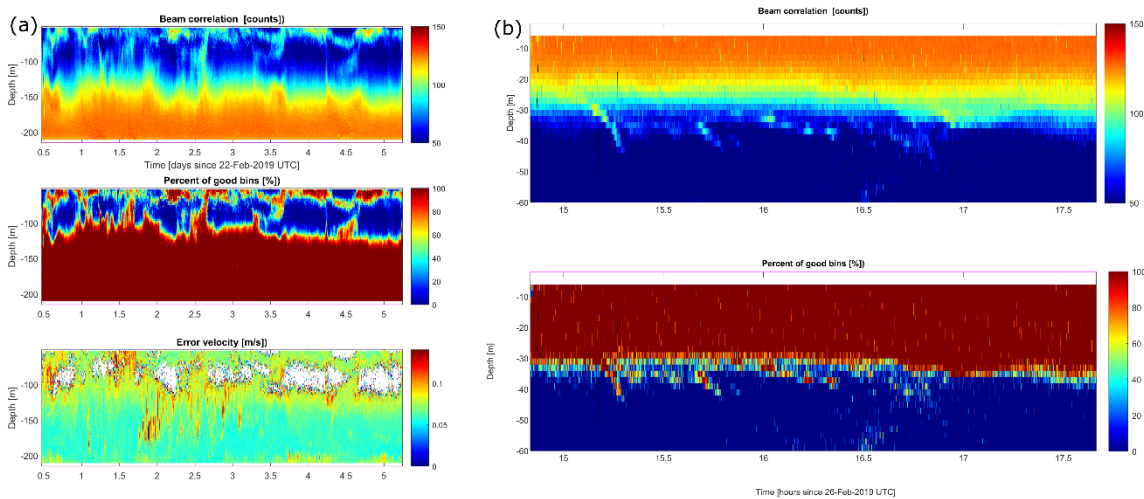

**Figure S3: Validation parameters of mooring ADCP deployed during EL19 and ship ADCP during transect T37 shown in Figure 2.**

**Table S1: All MSS microstructure transects during EL19-IGV01.**

| ID  | Profile | Location of transect | Start (UTC)          | End (UTC)            |
|-----|---------|----------------------|----------------------|----------------------|
| T01 | 006-009 | Test                 | 21-Feb-2019 12:55:00 | 21-Feb-2019 13:40:00 |
| T02 | 010-012 | Standard             | 22-Feb-2019 12:33:34 | 22-Feb-2019 12:54:18 |
| T03 | 013-015 | Standard             | 22-Feb-2019 13:10:01 | 22-Feb-2019 13:30:54 |
| T04 | 016-018 | Standard             | 22-Feb-2019 13:46:57 | 22-Feb-2019 14:09:40 |
| T05 | 019-020 | NW01 to SE01         | 22-Feb-2019 16:07:30 | 22-Feb-2019 16:22:23 |
| T06 | 021-024 | Standard             | 23-Feb-2019 08:28:45 | 23-Feb-2019 09:00:56 |

|     |         |                    |                      |                      |
|-----|---------|--------------------|----------------------|----------------------|
| T07 | 025-029 | Standard           | 23-Feb-2019 09:25:52 | 23-Feb-2019 10:00:33 |
| T08 | 030-035 | Standard           | 23-Feb-2019 10:23:39 | 23-Feb-2019 11:11:31 |
| T09 | 036-041 | Standard           | 23-Feb-2019 12:56:54 | 23-Feb-2019 13:43:34 |
| T10 | 042-048 | Standard           | 23-Feb-2019 14:04:22 | 23-Feb-2019 14:51:04 |
| T11 | 049     | Standard           | 23-Feb-2019 15:09:51 | 23-Feb-2019 15:14:51 |
| T12 | 050-057 | Standard           | 24-Feb-2019 08:41:21 | 24-Feb-2019 09:38:34 |
| T13 | 058-065 | Standard           | 24-Feb-2019 10:01:54 | 24-Feb-2019 11:00:08 |
| T14 | 066-071 | Standard           | 24-Feb-2019 12:43:37 | 24-Feb-2019 13:31:14 |
| T15 | 072-092 | RidgeS to RidgeN   | 25-Feb-2019 11:14:27 | 25-Feb-2019 13:05:46 |
| T16 | 093-103 | ValleyS to ValleyN | 25-Feb-2019 13:48:08 | 25-Feb-2019 15:17:17 |
| T17 | 104-113 | SE02 to NW02       | 25-Feb-2019 16:16:45 | 25-Feb-2019 17:12:58 |
| T18 | 114-118 | Standard           | 25-Feb-2019 18:38:21 | 25-Feb-2019 19:12:34 |
| T19 | 119-122 | Standard           | 25-Feb-2019 19:31:45 | 25-Feb-2019 20:00:54 |
| T20 | 123-127 | Standard           | 25-Feb-2019 20:21:55 | 25-Feb-2019 21:01:53 |
| T21 | 128-132 | Standard           | 25-Feb-2019 21:28:56 | 25-Feb-2019 22:04:28 |
| T22 | 133-138 | Standard           | 25-Feb-2019 22:24:56 | 25-Feb-2019 23:09:52 |
| T23 | 139-143 | Standard           | 25-Feb-2019 23:31:07 | 26-Feb-2019 00:09:35 |
| T24 | 144-148 | Standard           | 26-Feb-2019 00:30:28 | 26-Feb-2019 01:09:02 |
| T25 | 149-152 | Standard           | 26-Feb-2019 01:30:55 | 26-Feb-2019 02:02:23 |
| T26 | 153-156 | Standard           | 26-Feb-2019 02:22:47 | 26-Feb-2019 02:52:28 |
| T27 | 157-160 | Standard           | 26-Feb-2019 03:13:09 | 26-Feb-2019 03:45:20 |
| T28 | 161-165 | Standard           | 26-Feb-2019 04:07:01 | 26-Feb-2019 04:47:41 |
| T29 | 166-170 | Standard           | 26-Feb-2019 05:09:58 | 26-Feb-2019 05:49:42 |
| T30 | 171-175 | Standard           | 26-Feb-2019 06:11:46 | 26-Feb-2019 06:50:39 |
| T31 | 176-181 | Standard           | 26-Feb-2019 07:10:00 | 26-Feb-2019 07:52:07 |
| T32 | 182-187 | Standard           | 26-Feb-2019 08:13:35 | 26-Feb-2019 09:05:00 |
| T33 | 188-193 | Standard           | 26-Feb-2019 09:26:08 | 26-Feb-2019 10:11:14 |
| T34 | 194-200 | Standard           | 26-Feb-2019 10:32:29 | 26-Feb-2019 11:24:53 |
| T35 | 201-205 | Standard           | 26-Feb-2019 12:06:42 | 26-Feb-2019 12:48:37 |
| T36 | 206-211 | Standard           | 26-Feb-2019 13:08:10 | 26-Feb-2019 13:52:48 |
| T37 | 212-230 | Standard to FN     | 26-Feb-2019 14:54:21 | 26-Feb-2019 17:43:47 |

|     |         |              |                      |                      |
|-----|---------|--------------|----------------------|----------------------|
| T38 | 231-236 | SE03 to NW03 | 26-Feb-2019 18:46:41 | 26-Feb-2019 19:08:13 |
| T39 | 237-242 | EW01         | 26-Feb-2019 19:40:59 | 26-Feb-2019 20:07:02 |
| T40 | 243-254 | EW02         | 26-Feb-2019 20:43:11 | 26-Feb-2019 21:11:45 |
| T41 | 255-260 | EW03         | 26-Feb-2019 21:35:30 | 26-Feb-2019 21:56:06 |
| T42 | 261-264 | EW04         | 26-Feb-2019 22:20:08 | 26-Feb-2019 22:41:54 |
| T43 | 265-269 | Standard     | 26-Feb-2019 23:10:43 | 26-Feb-2019 23:51:28 |

**Table S2: All MSS microstructure transects during EL20-IGV01.**

| <b>ID</b> | <b>Profile</b> |  | <b>Location of transect</b> | <b>Date_Start_End (UTC)</b> |
|-----------|----------------|--|-----------------------------|-----------------------------|
| T01       | 5,6,7,8        |  | Standard                    | 20200228_1405_1445          |
| T02       | 9,10,11        |  | Standard                    | 20200228_1451_1519          |
| T03       | 12,13,14       |  | Standard                    | 20200228_1523_1555          |
| T04       | 15,16,17       |  | Standard                    | 20200228_1601_1629          |
| T05       | 18 - 24        |  | Standard                    | 20200229_0821_0940          |

|     |          |          |                    |
|-----|----------|----------|--------------------|
| T06 | 25 - 29  | Standard | 20200229_1012_1103 |
| T07 | 30 - 33  | Standard | 20200229_1206_1252 |
| T08 | 34,35,36 | Standard | 20200229_1436_1520 |
| T09 | 37,38    | Standard | 20200229_1530_1552 |
| T10 | 39 - 43  | Standard | 20200301_1037_1132 |
| T11 | 44 - 54  | Standard | 20200301_1244_1325 |
| T12 | 55,56,57 | UWR1     | 20200301_1440_1503 |
| T13 | 58       | UWR2     | 20200301_1513_1523 |
| T14 | 59       | UWR3     | 20200301_1525_1535 |
| T15 | 60 - 64  | Standard | 20200302_0822_0918 |
| T16 | 65,6     | Standard | 20200302_0942_1003 |
| T17 | 67,68,69 | Standard | 20200302_1012_1059 |
| T18 | 70,71    | Standard | 20200302_1109_1130 |
| T19 | 72,73    | Standard | 20200302_1149_1206 |
| T20 | 74,75    | Standard | 20200302_1214_1235 |
| T21 | 76 - 81  | SRUL1    | 20200302_1440_1536 |

|     |          |                    |                     |
|-----|----------|--------------------|---------------------|
| T22 | 82 - 88  | SRUL2              | 20200303_0903_1004  |
| T23 | 89 - 101 | SRUL3              | 20200303_1032_1151  |
| T24 | 102-113  | SRUL4              | 20200303_1225_1338  |
| T25 | 114-116  | SRUL5              | 20200303_1347_1447  |
| T26 | 117-122  | SRUL6              | 20200303_1511_1600  |
| T27 | 123-125  | SRUL7              | 20200303_1649_1710  |
| T28 | 126-128  | Standard           | 20200304_2139_2211  |
| T29 | 129-136  | Standard           | 20200304_2222_0022' |
| T30 | 137-140  | Standard           | 20200305_0416_0457  |
| T31 | 141-142  | Standard           | 20200305_0514_0551  |
| T32 | 144-150  | Standard           | 20200305_0608_0738  |
| T33 | 151,152  | Reference standard | 20200305_0740_0834  |
| T34 | 153-156  | Standard           | 20200305_0835_0920  |
| T35 | 157-160  | Standard           | 20200305_0941_1025  |
| T36 | 161-163  | Standard           | 20200305_1048_1122  |
| T37 | 164-167  | Standard           | 20200305_1140_1223  |
| T38 | 168-170  | Standard           | 20200305_1259_1338  |
| T39 | 171,172  | Standard           | 20200305_1403_1423  |

30

**Table S3: MSS casts near sill during EL19-IGV01. Used in Figures 9 and 10.**

| MSS | date      | time     | lon      | lat      | transect |
|-----|-----------|----------|----------|----------|----------|
| 22  | 23-Feb-19 | 8:38:56  | 18.94017 | 60.26873 | 6        |
| 23  | 23-Feb-19 | 8:48:14  | 18.936   | 60.26999 | 6        |
| 24  | 23-Feb-19 | 8:55:56  | 18.93232 | 60.27114 | 6        |
| 26  | 23-Feb-19 | 9:30:55  | 18.94202 | 60.26794 | 7        |
| 27  | 23-Feb-19 | 9:39:26  | 18.93925 | 60.269   | 7        |
| 28  | 23-Feb-19 | 9:47:15  | 18.9367  | 60.26973 | 7        |
| 29  | 23-Feb-19 | 9:55:33  | 18.93197 | 60.27116 | 7        |
| 31  | 23-Feb-19 | 10:33:53 | 18.94113 | 60.26834 | 8        |
| 32  | 23-Feb-19 | 10:42:51 | 18.93876 | 60.26912 | 8        |
| 33  | 23-Feb-19 | 10:51:29 | 18.93686 | 60.2697  | 8        |
| 34  | 23-Feb-19 | 10:59:10 | 18.93344 | 60.27073 | 8        |
| 35  | 23-Feb-19 | 11:06:31 | 18.93041 | 60.27168 | 8        |
| 38  | 23-Feb-19 | 13:11:52 | 18.94176 | 60.26825 | 9        |

|     |           |          |          |          |    |
|-----|-----------|----------|----------|----------|----|
| 39  | 23-Feb-19 | 13:20:53 | 18.93903 | 60.26905 | 9  |
| 40  | 23-Feb-19 | 13:29:14 | 18.93619 | 60.26987 | 9  |
| 41  | 23-Feb-19 | 13:38:34 | 18.93254 | 60.27105 | 9  |
| 44  | 23-Feb-19 | 14:16:21 | 18.94155 | 60.2682  | 10 |
| 45  | 23-Feb-19 | 14:24:43 | 18.93962 | 60.26894 | 10 |
| 46  | 23-Feb-19 | 14:32:58 | 18.93651 | 60.26979 | 10 |
| 47  | 23-Feb-19 | 14:39:38 | 18.93426 | 60.27052 | 10 |
| 48  | 23-Feb-19 | 14:46:04 | 18.93185 | 60.27125 | 10 |
| 52  | 24-Feb-19 | 8:58:28  | 18.94233 | 60.26793 | 12 |
| 53  | 24-Feb-19 | 9:06:26  | 18.93943 | 60.2689  | 12 |
| 54  | 24-Feb-19 | 9:13:29  | 18.93766 | 60.26942 | 12 |
| 55  | 24-Feb-19 | 9:20:35  | 18.93643 | 60.26972 | 12 |
| 56  | 24-Feb-19 | 9:27:00  | 18.93428 | 60.27045 | 12 |
| 57  | 24-Feb-19 | 9:33:34  | 18.93112 | 60.2715  | 12 |
| 59  | 24-Feb-19 | 10:10:49 | 18.94311 | 60.26761 | 13 |
| 60  | 24-Feb-19 | 10:19:47 | 18.94014 | 60.26875 | 13 |
| 62  | 24-Feb-19 | 10:40:18 | 18.93884 | 60.26901 | 13 |
| 64  | 24-Feb-19 | 10:48:23 | 18.93621 | 60.26983 | 13 |
| 65  | 24-Feb-19 | 10:55:08 | 18.93348 | 60.27066 | 13 |
| 68  | 24-Feb-19 | 13:01:00 | 18.94075 | 60.26859 | 14 |
| 69  | 24-Feb-19 | 13:09:09 | 18.93831 | 60.2693  | 14 |
| 70  | 24-Feb-19 | 13:18:16 | 18.93531 | 60.2702  | 14 |
| 71  | 24-Feb-19 | 13:26:14 | 18.93266 | 60.27101 | 14 |
| 76  | 25-Feb-19 | 11:45:12 | 18.93221 | 60.26777 | 15 |
| 77  | 25-Feb-19 | 11:56:10 | 18.93478 | 60.27123 | 15 |
| 96  | 25-Feb-19 | 14:07:59 | 18.92976 | 60.2682  | 16 |
| 97  | 25-Feb-19 | 14:17:47 | 18.93193 | 60.27169 | 16 |
| 116 | 25-Feb-19 | 18:54:27 | 18.94059 | 60.2685  | 18 |
| 117 | 25-Feb-19 | 19:01:37 | 18.93657 | 60.2699  | 18 |
| 118 | 25-Feb-19 | 19:07:34 | 18.93318 | 60.27092 | 18 |
| 120 | 25-Feb-19 | 19:41:05 | 18.94306 | 60.26784 | 19 |
| 121 | 25-Feb-19 | 19:49:16 | 18.93768 | 60.26954 | 19 |
| 122 | 25-Feb-19 | 19:55:54 | 18.93378 | 60.27086 | 19 |
| 125 | 25-Feb-19 | 20:39:34 | 18.93736 | 60.26971 | 20 |
| 126 | 25-Feb-19 | 20:46:42 | 18.93277 | 60.27109 | 20 |
| 129 | 25-Feb-19 | 21:37:13 | 18.94333 | 60.26762 | 21 |
| 130 | 25-Feb-19 | 21:44:53 | 18.93847 | 60.26923 | 21 |

|     |           |          |          |          |    |
|-----|-----------|----------|----------|----------|----|
| 135 | 25-Feb-19 | 22:42:05 | 18.94086 | 60.26844 | 22 |
| 136 | 25-Feb-19 | 22:49:29 | 18.93785 | 60.26918 | 22 |
| 137 | 25-Feb-19 | 22:56:12 | 18.93447 | 60.27026 | 22 |
| 138 | 25-Feb-19 | 23:04:52 | 18.93007 | 60.27228 | 22 |
| 141 | 25-Feb-19 | 23:49:16 | 18.94022 | 60.26884 | 23 |
| 142 | 25-Feb-19 | 23:57:14 | 18.93554 | 60.27004 | 23 |
| 146 | 26-Feb-19 | 0:47:57  | 18.94105 | 60.26824 | 24 |
| 148 | 26-Feb-19 | 1:04:02  | 18.93106 | 60.27148 | 24 |
| 150 | 26-Feb-19 | 1:39:54  | 18.94244 | 60.26789 | 25 |
| 151 | 26-Feb-19 | 1:50:52  | 18.93624 | 60.2701  | 25 |
| 155 | 26-Feb-19 | 2:40:59  | 18.93513 | 60.27006 | 26 |
| 156 | 26-Feb-19 | 2:47:28  | 18.93088 | 60.27173 | 26 |
| 158 | 26-Feb-19 | 3:22:48  | 18.94325 | 60.26771 | 27 |
| 159 | 26-Feb-19 | 3:32:26  | 18.93609 | 60.27003 | 27 |
| 160 | 26-Feb-19 | 3:40:20  | 18.93085 | 60.27176 | 27 |
| 163 | 26-Feb-19 | 4:22:55  | 18.93916 | 60.26895 | 28 |
| 164 | 26-Feb-19 | 4:31:09  | 18.93398 | 60.27076 | 28 |
| 167 | 26-Feb-19 | 5:18:16  | 18.94351 | 60.26757 | 29 |
| 168 | 26-Feb-19 | 5:26:47  | 18.93731 | 60.26964 | 29 |
| 169 | 26-Feb-19 | 5:33:35  | 18.93202 | 60.27112 | 29 |
| 173 | 26-Feb-19 | 6:29:38  | 18.93785 | 60.26953 | 30 |
| 174 | 26-Feb-19 | 6:36:43  | 18.9327  | 60.27071 | 30 |
| 178 | 26-Feb-19 | 7:27:09  | 18.93906 | 60.269   | 31 |
| 180 | 26-Feb-19 | 7:38:00  | 18.93199 | 60.27116 | 31 |
| 184 | 26-Feb-19 | 8:32:25  | 18.94206 | 60.26796 | 32 |
| 185 | 26-Feb-19 | 8:41:15  | 18.93787 | 60.26954 | 32 |
| 186 | 26-Feb-19 | 8:49:08  | 18.93293 | 60.27042 | 32 |
| 187 | 26-Feb-19 | 9:00:00  | 18.93    | 60.27247 | 32 |
| 190 | 26-Feb-19 | 9:42:03  | 18.94212 | 60.26816 | 33 |
| 191 | 26-Feb-19 | 9:50:16  | 18.93644 | 60.26993 | 33 |
| 192 | 26-Feb-19 | 9:56:48  | 18.9323  | 60.27074 | 33 |
| 193 | 26-Feb-19 | 10:06:14 | 18.92977 | 60.27281 | 33 |
| 196 | 26-Feb-19 | 10:48:54 | 18.942   | 60.26806 | 34 |
| 197 | 26-Feb-19 | 10:56:27 | 18.93906 | 60.26903 | 34 |
| 198 | 26-Feb-19 | 11:03:21 | 18.93573 | 60.27012 | 34 |
| 199 | 26-Feb-19 | 11:09:30 | 18.93224 | 60.27107 | 34 |
| 200 | 26-Feb-19 | 11:19:53 | 18.92998 | 60.27312 | 34 |



|     |           |          |          |          |    |
|-----|-----------|----------|----------|----------|----|
| 203 | 26-Feb-19 | 12:26:52 | 18.93751 | 60.26972 | 35 |
| 204 | 26-Feb-19 | 12:34:06 | 18.93168 | 60.27122 | 35 |
| 208 | 26-Feb-19 | 13:24:47 | 18.94056 | 60.26855 | 36 |
| 209 | 26-Feb-19 | 13:32:17 | 18.936   | 60.26999 | 36 |
| 210 | 26-Feb-19 | 13:38:44 | 18.93265 | 60.27086 | 36 |
| 211 | 26-Feb-19 | 13:47:48 | 18.92925 | 60.2722  | 36 |
| 213 | 26-Feb-19 | 15:03:59 | 18.94261 | 60.26789 | 37 |
| 214 | 26-Feb-19 | 15:12:38 | 18.93592 | 60.26999 | 37 |
| 215 | 26-Feb-19 | 15:19:22 | 18.93139 | 60.27135 | 37 |
| 266 | 26-Feb-19 | 23:20:22 | 18.94164 | 60.26817 | 43 |
| 268 | 26-Feb-19 | 23:35:33 | 18.93098 | 60.27127 | 43 |

*Table S4: MSS casts near sill during EL20-IGV01. Used in Figures 9 and 10.*

| MSS | date      | time     | lon      | lat      | transect |
|-----|-----------|----------|----------|----------|----------|
| 8   | 28-Feb-20 | 14:40:31 | 18.93839 | 60.26909 | 1        |
| 9   | 28-Feb-20 | 14:56:46 | 18.92882 | 60.27219 | 2        |
| 10  | 28-Feb-20 | 15:07:03 | 18.93641 | 60.2697  | 2        |
| 11  | 28-Feb-20 | 15:14:39 | 18.94185 | 60.2679  | 2        |
| 14  | 28-Feb-20 | 15:50:33 | 18.93887 | 60.26907 | 3        |
| 15  | 28-Feb-20 | 16:06:24 | 18.92865 | 60.2722  | 4        |
| 16  | 28-Feb-20 | 16:17:09 | 18.93729 | 60.26961 | 4        |
| 22  | 29-Feb-20 | 9:15:24  | 18.93896 | 60.26892 | 5        |
| 23  | 29-Feb-20 | 9:25:02  | 18.93319 | 60.27073 | 5        |
| 24  | 29-Feb-20 | 9:35:54  | 18.92985 | 60.27354 | 5        |
| 26  | 29-Feb-20 | 10:28:20 | 18.9429  | 60.26759 | 6        |
| 27  | 29-Feb-20 | 10:38:22 | 18.93697 | 60.26943 | 6        |
| 28  | 29-Feb-20 | 10:46:53 | 18.93212 | 60.2709  | 6        |
| 30  | 29-Feb-20 | 12:11:58 | 18.93003 | 60.27174 | 7        |
| 41  | 1-Mar-20  | 11:07:11 | 18.9429  | 60.26788 | 10       |
| 42  | 1-Mar-20  | 11:19:09 | 18.93701 | 60.26969 | 10       |
| 43  | 1-Mar-20  | 11:27:58 | 18.93248 | 60.27104 | 10       |
| 49  | 1-Mar-20  | 13:04:48 | 18.94325 | 60.2673  | 11       |
| 50  | 1-Mar-20  | 13:07:48 | 18.94152 | 60.26819 | 11       |
| 51  | 1-Mar-20  | 13:10:43 | 18.93977 | 60.26865 | 11       |
| 52  | 1-Mar-20  | 13:13:42 | 18.93793 | 60.26929 | 11       |
| 53  | 1-Mar-20  | 13:16:47 | 18.93589 | 60.26996 | 11       |

|     |          |          |          |          |    |
|-----|----------|----------|----------|----------|----|
| 54  | 1-Mar-20 | 13:20:24 | 18.93345 | 60.2708  | 11 |
| 62  | 2-Mar-20 | 8:51:41  | 18.94133 | 60.26816 | 15 |
| 63  | 2-Mar-20 | 9:03:35  | 18.93456 | 60.27031 | 15 |
| 64  | 2-Mar-20 | 9:13:41  | 18.92901 | 60.27227 | 15 |
| 65  | 2-Mar-20 | 9:47:13  | 18.93592 | 60.26971 | 16 |
| 68  | 2-Mar-20 | 10:43:10 | 18.93337 | 60.27083 | 17 |
| 69  | 2-Mar-20 | 10:54:45 | 18.92883 | 60.27283 | 17 |
| 70  | 2-Mar-20 | 11:14:26 | 18.93136 | 60.27187 | 18 |
| 71  | 2-Mar-20 | 11:25:59 | 18.93977 | 60.26884 | 18 |
| 72  | 2-Mar-20 | 11:54:01 | 18.93656 | 60.26978 | 19 |
| 73  | 2-Mar-20 | 12:01:23 | 18.93204 | 60.27109 | 19 |
| 74  | 2-Mar-20 | 12:19:07 | 18.93039 | 60.27208 | 20 |
| 75  | 2-Mar-20 | 12:30:01 | 18.93715 | 60.26956 | 20 |
| 126 | 4-Mar-20 | 21:44:36 | 18.94218 | 60.26765 | 28 |
| 127 | 4-Mar-20 | 21:55:11 | 18.93765 | 60.26894 | 28 |
| 128 | 4-Mar-20 | 22:06:17 | 18.93259 | 60.27094 | 28 |
| 129 | 4-Mar-20 | 22:27:19 | 18.93149 | 60.27159 | 29 |
| 130 | 4-Mar-20 | 22:34:12 | 18.93654 | 60.26974 | 29 |
| 131 | 4-Mar-20 | 22:42:34 | 18.94151 | 60.26819 | 29 |
| 132 | 4-Mar-20 | 23:06:41 | 18.93789 | 60.26936 | 40 |
| 133 | 4-Mar-20 | 23:16:01 | 18.93326 | 60.27043 | 40 |
| 135 | 5-Mar-20 | 0:06:54  | 18.93649 | 60.26961 | 42 |
| 136 | 5-Mar-20 | 0:17:28  | 18.93043 | 60.27158 | 43 |
| 139 | 5-Mar-20 | 4:43:12  | 18.9391  | 60.26894 | 30 |
| 140 | 5-Mar-20 | 4:52:11  | 18.9349  | 60.2703  | 30 |
| 142 | 5-Mar-20 | 5:33:24  | 18.94198 | 60.26798 | 31 |
| 145 | 5-Mar-20 | 6:25:47  | 18.94303 | 60.26763 | 32 |
| 146 | 5-Mar-20 | 6:35:26  | 18.93723 | 60.26945 | 32 |
| 147 | 5-Mar-20 | 6:43:01  | 18.93281 | 60.27085 | 32 |
| 149 | 5-Mar-20 | 7:20:18  | 18.9411  | 60.26832 | 44 |
| 150 | 5-Mar-20 | 7:33:09  | 18.93255 | 60.27095 | 44 |
| 155 | 5-Mar-20 | 9:05:06  | 18.93841 | 60.26923 | 34 |
| 156 | 5-Mar-20 | 9:15:56  | 18.93202 | 60.27126 | 34 |
| 159 | 5-Mar-20 | 10:11:54 | 18.93568 | 60.27    | 35 |
| 160 | 5-Mar-20 | 10:20:00 | 18.93033 | 60.27169 | 35 |
| 162 | 5-Mar-20 | 11:05:15 | 18.94082 | 60.26839 | 36 |
| 163 | 5-Mar-20 | 11:17:24 | 18.93281 | 60.27087 | 36 |

|     |          |          |          |          |    |
|-----|----------|----------|----------|----------|----|
| 166 | 5-Mar-20 | 12:08:06 | 18.93815 | 60.26917 | 37 |
| 167 | 5-Mar-20 | 12:18:57 | 18.93203 | 60.27112 | 37 |
| 169 | 5-Mar-20 | 13:18:03 | 18.94338 | 60.26769 | 38 |
| 170 | 5-Mar-20 | 13:33:28 | 18.93241 | 60.271   | 38 |

35
